# Supplementary material for: High temperature anionic Fe(iii) spin crossover behavior in a mixed-valence Fe(ii)/Fe(iii) complex
Source: Royal Society of Chemistry journal article supplement (doi:10.1039/d1dt00111f), 2021-01-01
Supplement: d1dt00111f1.pdf [file d1dt00111f1.pdf]

# Supporting Information for

## High temperature anionic Fe(III) spin crossover behavior in a mixed-valence Fe(II)/Fe(III) complex

### *Contents of the Supporting Information*

**Table S1.** Crystallographic parameters for complexes **1** and **2**

**Table S2.** Fe–O, Fe–N Bond lengths (Å) around Fe center and BVS values for Fe atom in complex **1**

**Table S3.** Fe–O, Fe–N Bond lengths (Å) around Fe centers and BVS values for Fe atoms in complex **2**

**Fig. S1** Photographs of complexes **1** (a) and **2** (b).

**Fig. S2** TG curves of complexes **1** and **2**

**Fig. S3** PXRD patterns for simulations, 298 K and 500 K recool to 298 K of complexes **1** (a) and **2** (b).

**Fig. S4** Plot of  $\chi_M T$  vs. T for complex **2**.

**Fig. S5** EPR spectrum recorded at 500 K for complex **2** showing the trapped HS Fe(III) species.

**Fig. S6** Raman spectra for H<sub>3</sub>ATD, **1** and **2** at room temperatures.

**Fig. S7.** Variable-temperature Raman spectra of complexes **1** (a) and **2** (b) at 298 K, 400 K, 440K, 480 K, 500 K.

**Table S4.** Experimental Raman spectrum (cm<sup>-1</sup>) for H<sub>3</sub>ATD, **1** and **2** at room temperatures.

**Fig. S8** Raman spectra for 298 K, 500 K and 500 K recool to 298 K of complexes **1** (a) and **2** (b).

**Fig. S9** N⋯H & H⋯N, C⋯H & H⋯C and H⋯H contact-decomposed 2D Fingerprint plots fo **1-Fe**, **2-Fe-1** and **2-Fe-2**.

**Fig. S10** O⋯H & H⋯O and C⋯C contact-decomposed 2D Fingerprint plots fo **1-Fe**, **2-Fe-1** and **2-Fe-2**.

**Table S1.** Crystallographic parameters for complexes **1** and **2**

| Identification code                                   | Complex_1                                                          | Complex_2                                                                         |
|-------------------------------------------------------|--------------------------------------------------------------------|-----------------------------------------------------------------------------------|
| Empirical formula                                     | C <sub>46</sub> H <sub>36</sub> FeN <sub>12</sub> O <sub>6</sub> P | C <sub>184</sub> H <sub>164</sub> Fe <sub>6</sub> N <sub>66</sub> O <sub>29</sub> |
| Formula weight                                        | 939.69                                                             | 4098.90                                                                           |
| Temperature/K                                         | 100.01(10)                                                         | 100.00(10)                                                                        |
| Crystal system                                        | triclinic                                                          | triclinic                                                                         |
| Space group                                           | <i>P</i> $\bar{1}$                                                 | <i>P</i> $\bar{1}$                                                                |
| <i>a</i> /Å                                           | 12.8708(3)                                                         | 16.2038(4)                                                                        |
| <i>b</i> /Å                                           | 13.1238(3)                                                         | 16.8009(3)                                                                        |
| <i>c</i> /Å                                           | 15.2393(4)                                                         | 17.1213(3)                                                                        |
| $\alpha$ /°                                           | 107.870(2)                                                         | 82.518(2)                                                                         |
| $\beta$ /°                                            | 112.612(2)                                                         | 74.902(2)                                                                         |
| $\gamma$ /°                                           | 100.095(2)                                                         | 84.267(2)                                                                         |
| Volume/Å <sup>3</sup>                                 | 2131.90(10)                                                        | 4451.26(16)                                                                       |
| Z                                                     | 2                                                                  | 1                                                                                 |
| $\rho_{\text{calc}}$ /cm <sup>3</sup>                 | 1.464                                                              | 1.529                                                                             |
| $\mu$ /mm <sup>-1</sup>                               | 3.747                                                              | 4.603                                                                             |
| F(000)                                                | 970.0                                                              | 2118.0                                                                            |
| 2 $\theta$ range for data collection/°                | 6.896 to 151.994                                                   | 5.318 to 154.178                                                                  |
| Reflections collected                                 | 19524                                                              | 60753                                                                             |
| Independent reflections                               | 8336 [Rint = 0.0846, Rsigma = 0.0971]                              | 18150 [Rint = 0.0428, Rsigma = 0.0437]                                            |
| Data/restraints/parameters                            | 8336/6/609                                                         | 18150/6/1367                                                                      |
| Goodness-of-fit on F <sup>2</sup>                     | 1.059                                                              | 1.102                                                                             |
| Final R indexes [ <i>I</i> ≥ 2 $\sigma$ ( <i>I</i> )] | R1 = 0.0682, wR2 = 0.1600                                          | R1 = 0.0498, wR2 = 0.1355                                                         |
| Final R indexes [all data]                            | R1 = 0.0927, wR2 = 0.1935                                          | R1 = 0.0596, wR2 = 0.1412                                                         |
| Largest diff. peak/hole / e Å <sup>-3</sup>           | 0.52/-0.54                                                         | 0.99/-0.61                                                                        |

**Table S2.** Fe–O, Fe–N Bond lengths (Å) around Fe center and BVS values for Fe atom in complex **1**.

| <b>Complex 1</b> |                               |                     |
|------------------|-------------------------------|---------------------|
| <b>Bond</b>      | <b>Bond Length / Å</b>        | <b>Bond Valence</b> |
| Fe(1)–O(1)       | 1.894(3)                      | 0.678               |
| Fe(1)–O(3)       | 1.898(3)                      | 0.670               |
| Fe(1)–N(1)       | 1.926(4)                      | 0.543               |
| Fe(1)–N(6)       | 1.907(4)                      | 0.571               |
| Fe(1)–N(7)       | 1.911(4)                      | 0.565               |
| Fe(1)–N(12)      | 1.903(4)                      | 0.578               |
|                  | $\Sigma v(\text{Fe}) = 3.605$ |                     |

Bond Valence =  $\exp[(R_0 - d_{ij})/b]$ ,  $R_0 = 1.70$  for Fe(1)–N and  $1.75$  for Fe(1)–O,  $b = 0.37$ .<sup>1</sup>

**Table S3.** Fe–O, Fe–N Bond lengths (Å) around Fe centers and BVS values for Fe atoms in complex 2.

| <b>Complex 2</b> |                               |                     |             |                               |                     |
|------------------|-------------------------------|---------------------|-------------|-------------------------------|---------------------|
| <b>Bond</b>      | <b>Bond Length / Å</b>        | <b>Bond Valence</b> | <b>Bond</b> | <b>Bond Length / Å</b>        | <b>Bond Valence</b> |
| Fe(1)–O(1)       | 1.900(2)                      | 0.667               | Fe(2)–O(5)  | 1.890(2)                      | 0.685               |
| Fe(1)–O(3)       | 1.893(2)                      | 0.679               | Fe(2)–O(7)  | 1.889(2)                      | 0.687               |
| Fe(1)–N(1)       | 1.907(2)                      | 0.572               | Fe(2)–N(13) | 1.921(2)                      | 0.550               |
| Fe(1)–N(6)       | 1.923(2)                      | 0.547               | Fe(2)–N(18) | 1.935(2)                      | 0.530               |
| Fe(1)–N(7)       | 1.915(2)                      | 0.559               | Fe(2)–N(19) | 1.923(2)                      | 0.547               |
| Fe(1)–N(12)      | 1.917(2)                      | 0.556               | Fe(2)–N(24) | 1.925(2)                      | 0.544               |
|                  | $\Sigma v(\text{Fe}) = 3.580$ |                     |             | $\Sigma v(\text{Fe}) = 3.543$ |                     |

  

| <b>Bond</b> | <b>Bond Length / Å</b>        | <b>Bond Valence</b> |
|-------------|-------------------------------|---------------------|
| Fe(3)–N(25) | 1.977(2)                      | 0.333               |
| Fe(3)–N(26) | 1.984(2)                      | 0.327               |
| Fe(3)–N(27) | 1.987(2)                      | 0.324               |
| Fe(3)–N(28) | 1.990(2)                      | 0.321               |
| Fe(3)–N(29) | 1.969(2)                      | 0.340               |
| Fe(3)–N(30) | 1.969(2)                      | 0.340               |
|             | $\Sigma v(\text{Fe}) = 1.985$ |                     |

Bond Valence =  $\exp[(R_0 - d_{ij})/b]$ ,  $R_0 = 1.70$  for Fe(1)/(2)–N, 1.75 for Fe(1)/(2)–O, 1.57 for Fe(3)–N,  $b = 0.37$ .<sup>1</sup>

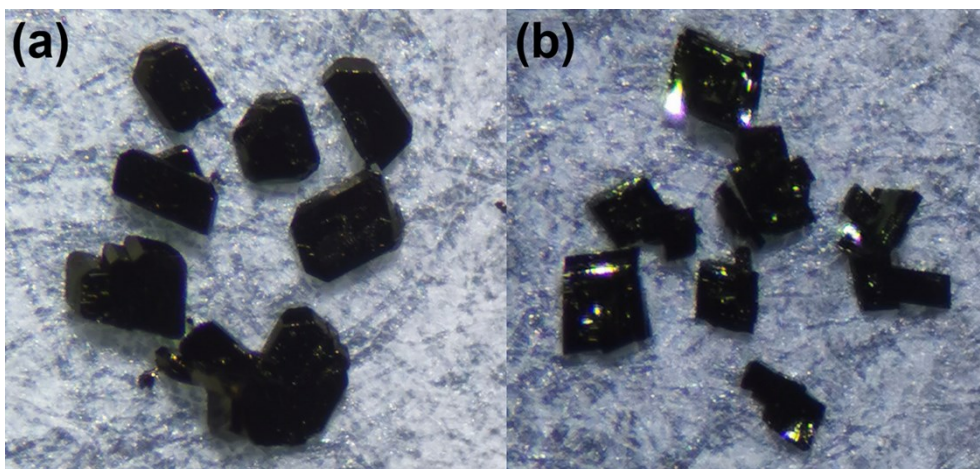

Fig. S1 Photographs of complexes **1** (a) and **2** (b).

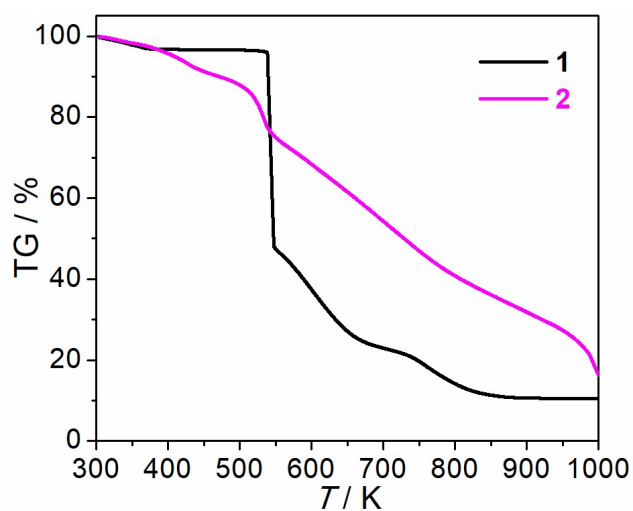

Fig. S2 TG curves of complexes **1** and **2**.

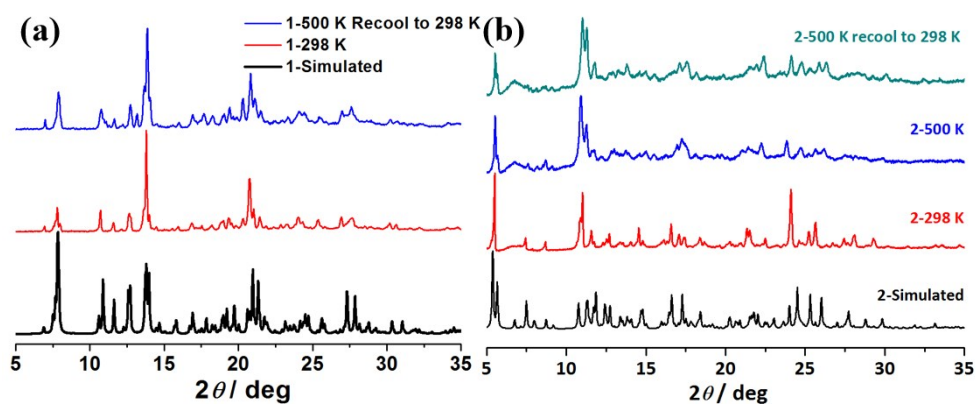

Fig. S3 PXRD patterns for simulations, 298 K and 500 K recool to 298 K of complexes **1** (a) and **2** (b).

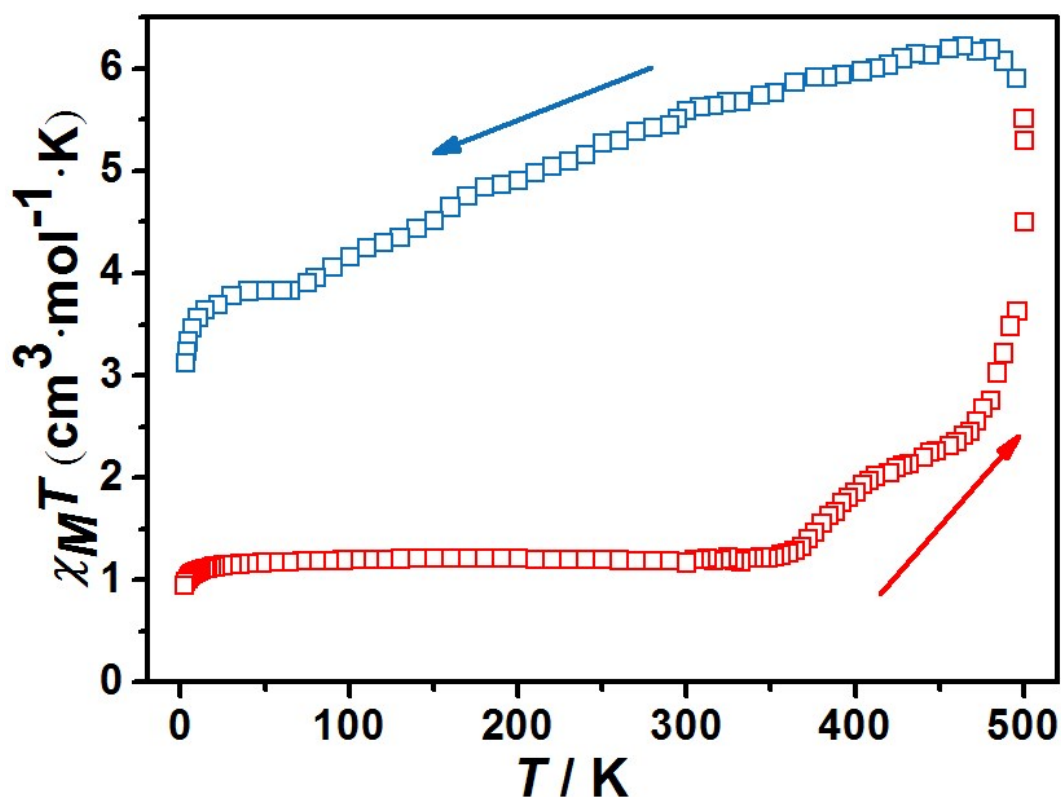

**Fig. S4** Plot of  $\chi_M T$  vs.  $T$  for complex **2**. The plot starts at 2 K, then the sample is warmed up to 500 K followed by cooling down to 2 K.

$\chi_M T$  of complex  $[\text{Fe}^{\text{II}}(\text{phen})_3][\text{Fe}^{\text{III}}(\text{HATD})_2]_2 \cdot 3\text{DMA} \cdot 3.5\text{H}_2\text{O}$  (**2**) shows a value close to  $1.2 \text{ cm}^3 \cdot \text{K} \cdot \text{mol}^{-1}$  from 10 to 360 K. Above this temperature, it increases abruptly to reach a value of  $5.52 \text{ cm}^3 \cdot \text{K} \cdot \text{mol}^{-1}$  at 500 K, which corresponds to 50 % of the molecules in the HS state. When the sample is cooled from 500 to 60 K, this value decreases from  $5.52 \text{ cm}^3 \cdot \text{K} \cdot \text{mol}^{-1}$  to  $3.82 \text{ cm}^3 \cdot \text{K} \cdot \text{mol}^{-1}$ . Below 50 K, the  $\chi_M T$  decreases abruptly to reach a value of  $2.50 \text{ cm}^3 \cdot \text{K} \cdot \text{mol}^{-1}$  at 2 K due to zero-field-splitting of HS Fe(III). This suggests that desolvation leads to irreversible structural changes that stabilize the HS state.<sup>2</sup>

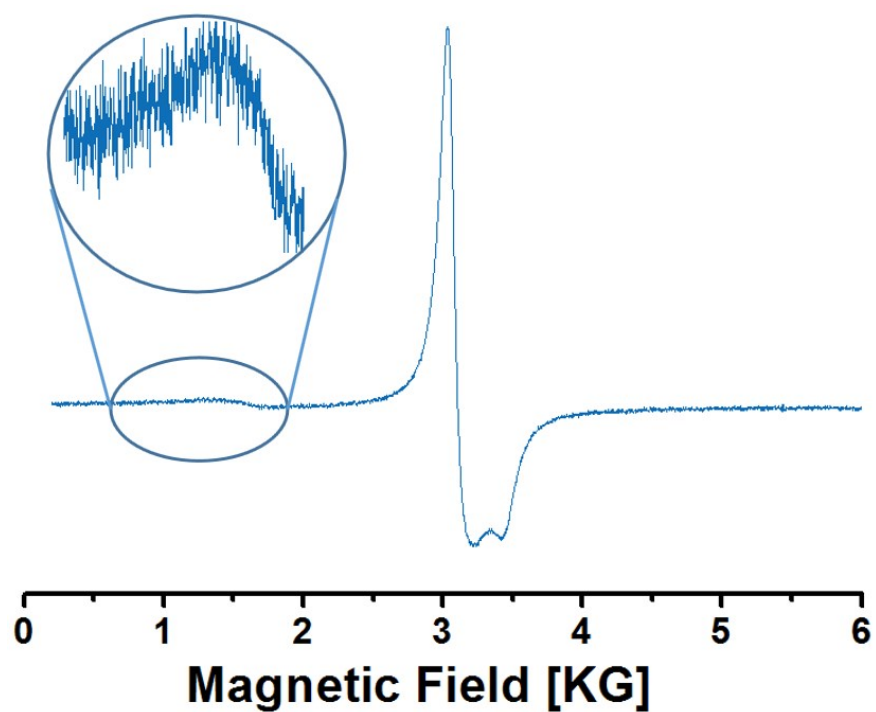

**Fig. S5** EPR spectrum recorded at 500 K for complex **2** showing the trapped HS Fe(III) species (zoomed in portion of the spectrum).

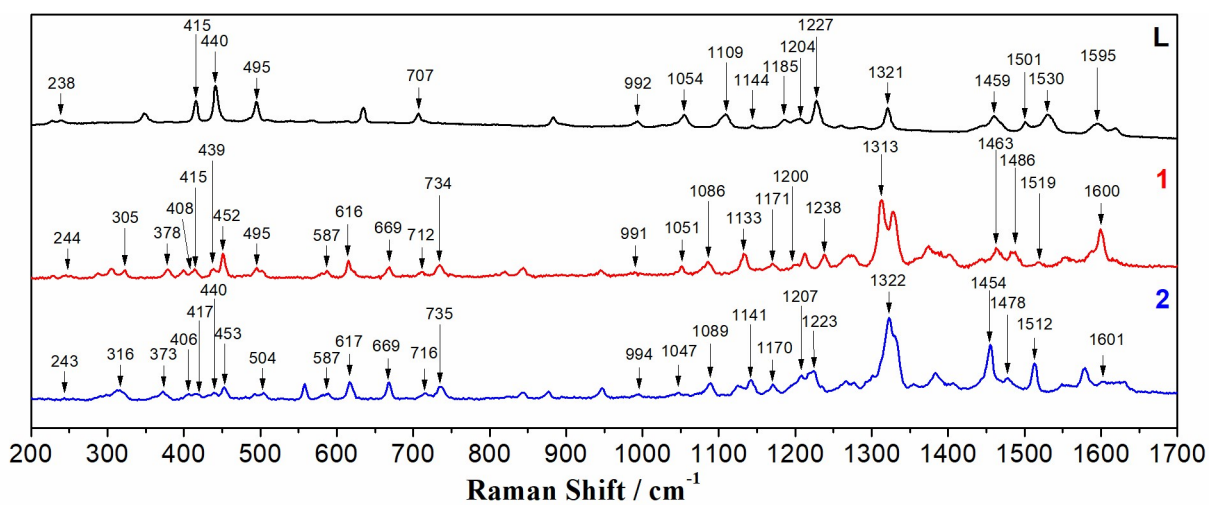

**Fig. S6** Raman spectra for H<sub>3</sub>ATD, **1** and **2** at room temperatures.

**Table S4.** Experimental Raman spectrum ( $\text{cm}^{-1}$ ) for  $\text{H}_3\text{ATD}$ , **1** and **2** at room temperatures.

| Ligand | $\text{cm}^{-1}$ |          | Assignments <sup>2-6</sup>                                                 |
|--------|------------------|----------|----------------------------------------------------------------------------|
|        | <b>1</b>         | <b>2</b> |                                                                            |
| 238    | 244              | 243      | C=C bending (naph)                                                         |
|        | 322              | 316      | Fe-O bending                                                               |
|        | 378              | 373      | Fe-N bending                                                               |
|        | 408              | 406      | Fe-O + Fe-N bending                                                        |
| 415    | 415              | 417      | C=C-N bending                                                              |
| 440    | 439              | 440      | O-C + N=N bending                                                          |
|        | 452              | 453      | Fe-N bending                                                               |
| 495    | 495              | 504      | C=C bending (naph)                                                         |
|        | 587              | 587      | Fe-N symmetric stretching                                                  |
|        | 616              | 617      | Fe-N asymmetric stretching                                                 |
|        | 669              | 669      | Fe-O symmetric stretching                                                  |
| 707    | 712              | 716      | C=C bending (naph)                                                         |
|        | 734              | 735      | Fe-O bending                                                               |
| 992    | 991              | 994      | N=N bending                                                                |
| 1054   | 1051             | 1047     | C-H bending and stretching                                                 |
| 1109   | 1086             | 1089     | symmetric stretching (naph ring)                                           |
| 1144   | 1133             | 1141     | C-H bending                                                                |
| 1185   | 1171             | 1170     | C-H bending + N-C stretching                                               |
| 1204   | 1200             | 1207     | C-H bending + N-C stretching + C=C stretching (naph)                       |
| 1227   | 1238             | 1223     | C-H + N-C stretching                                                       |
| 1321   | 1313             | 1322     | symmetric stretching (tetrazole ring)                                      |
| 1459   | 1463             | 1454     | symmetric stretching (tetrazole ring)                                      |
| 1501   | 1486             | 1478     | symmetric stretch (naph ring)                                              |
| 1530   | 1519             | 1512     | symmetric stretch (naph ring)                                              |
| 1595   | 1600             | 1601     | C-H bending + symmetric stretch (naph ring) + N=N/C-N symmetric stretching |



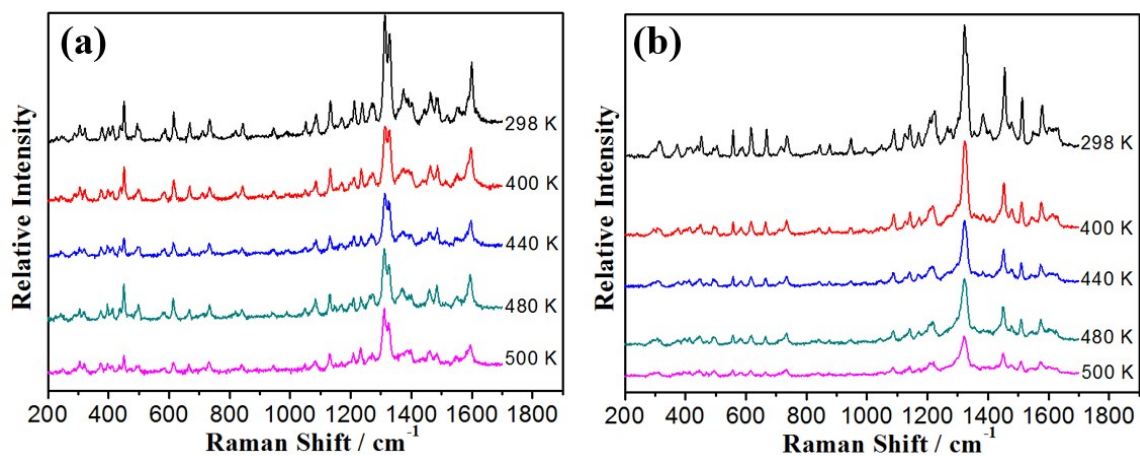

Fig. S7. variable-temperature Raman spectra of complexes **1** (a) and **2** (b) at 298 K, 400 K, 440K, 480 K, 500 K.

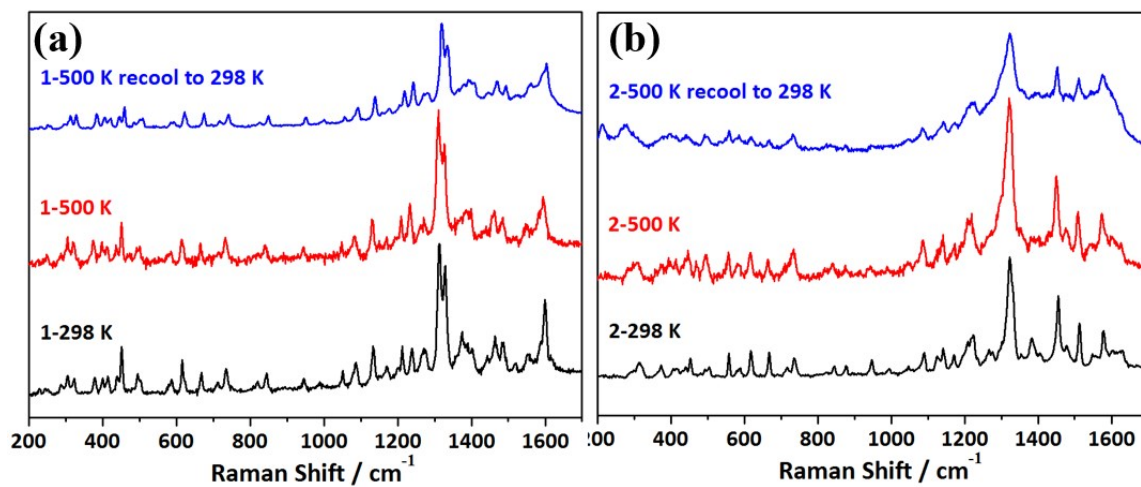

Fig. S8 Raman spectra for 298 K, 500 K and 500 K recool to 298 K of complexes **1** (a) and **2** (b).

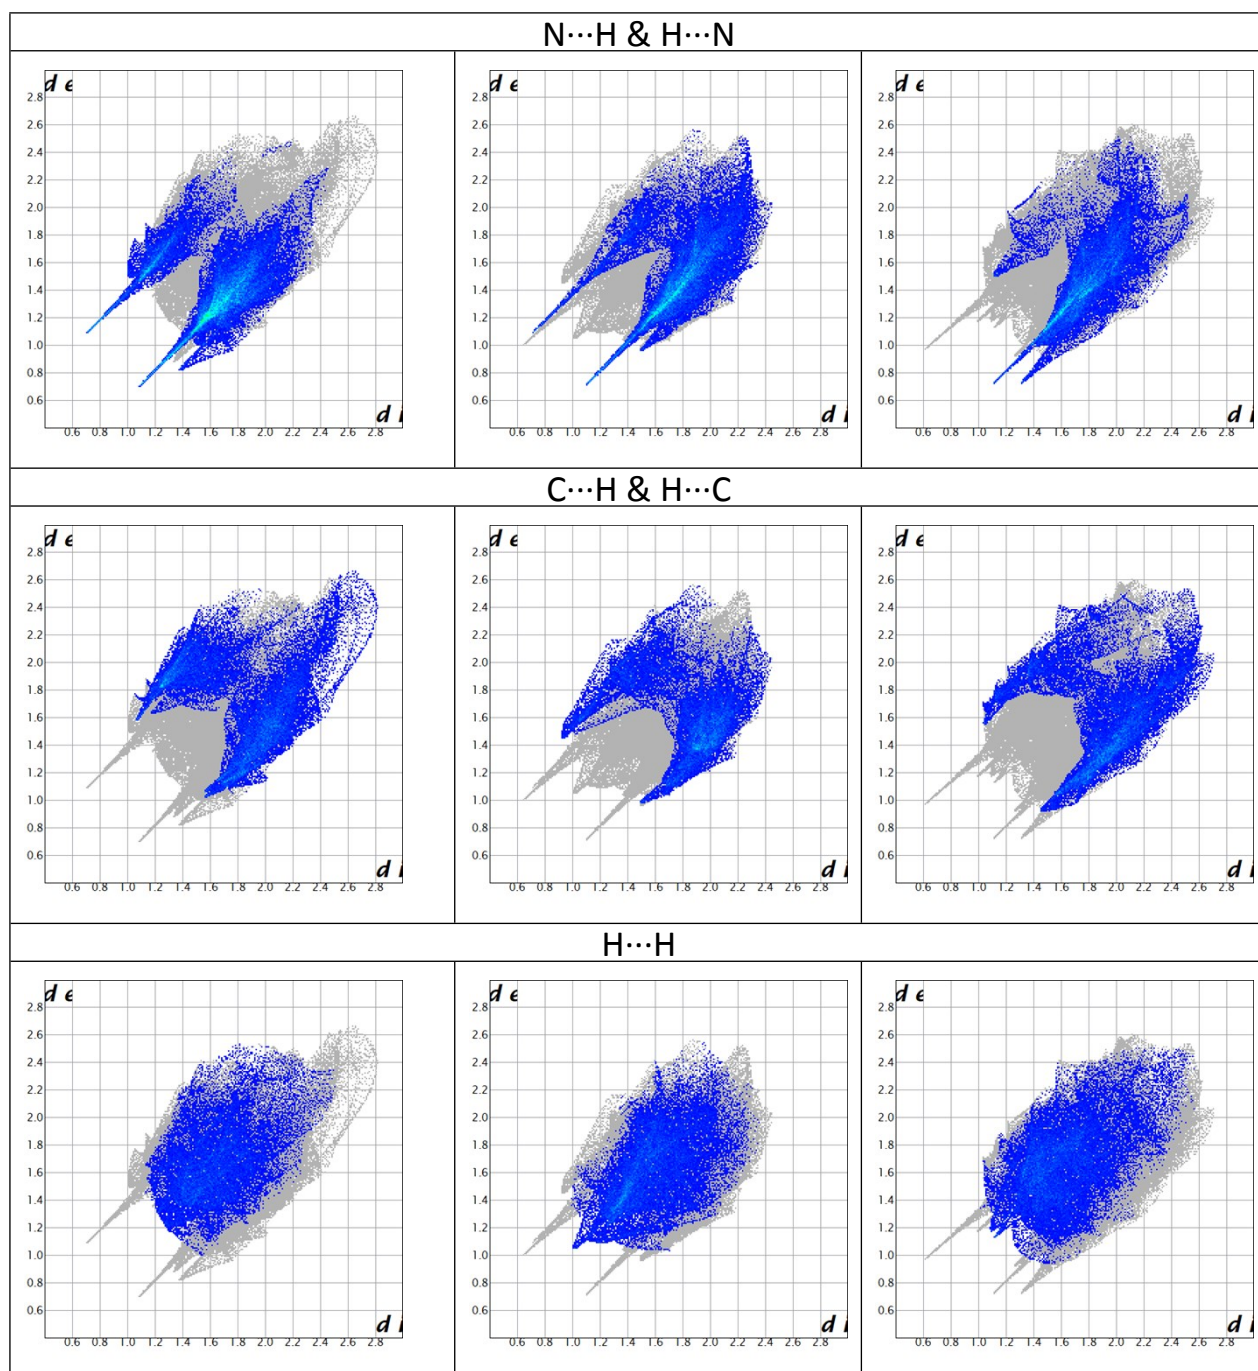

**Fig. S9** N...H & H...N, C...H & H...C and H...H contact-decomposed 2D Fingerprint plots for **1-Fe** (left column, **2-Fe-1** (bottom column) and **2-Fe-2** (right column)). Grey zones represent all of the interactions and the blue zones account for the corresponding selected interactions.

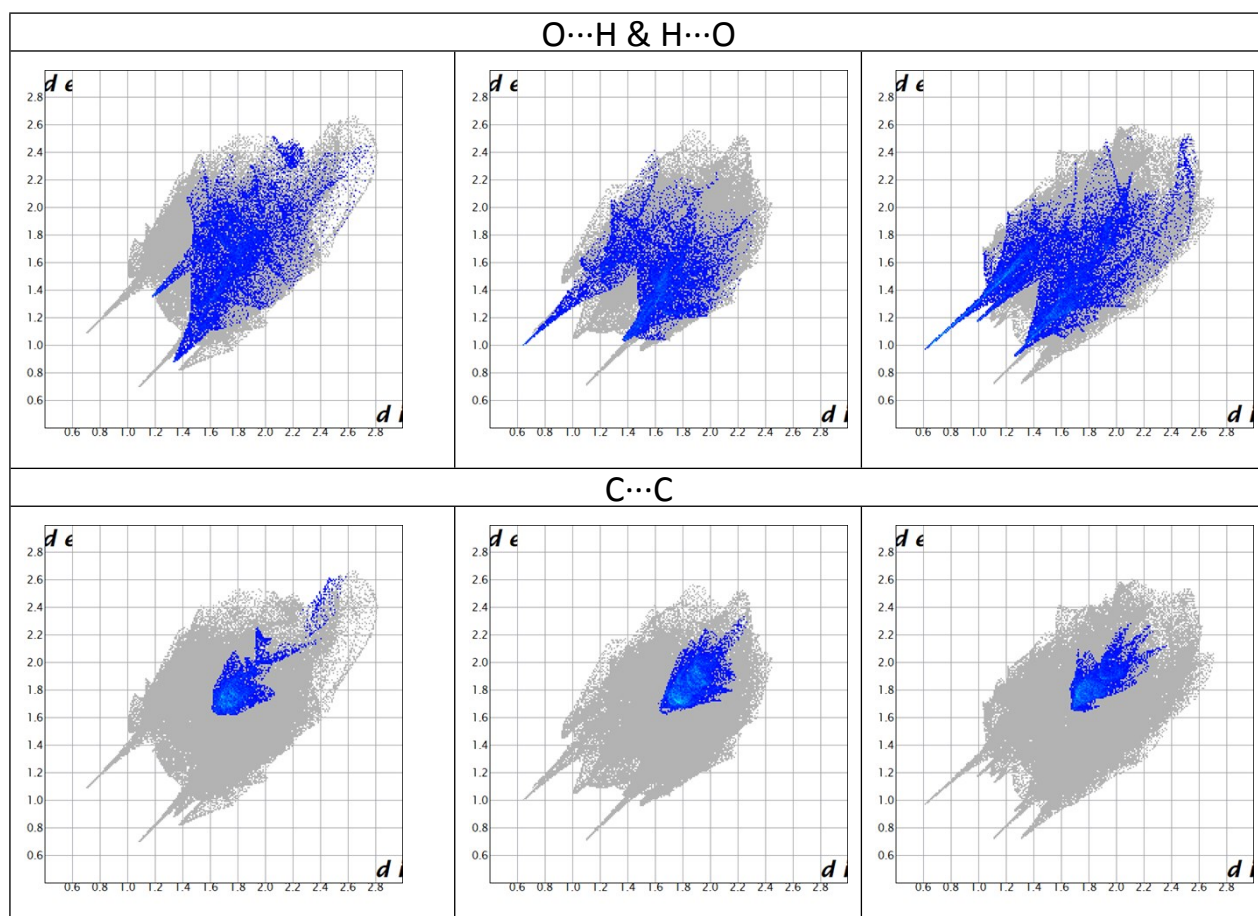

**Fig. S10** O...H & H...O and C...C contact-decomposed 2D Fingerprint plots for **1-Fe** (left column, **2-Fe-1** (bottom column) and **2-Fe-2** (right column)). Grey zones represent all of the interactions and the blue zones account for the corresponding selected interactions.

## References

- 1 H. Zheng, K. M. Langner, G. P. Shields, J. Hou, M. Kowiel, F. H. Allen, G. Murshudov and W. Minor, *Acta Crystallogr D Struct Biol*, 2017, **73**, 316-325.
2. A. J. Kunov-Kruse, S. B. Kristensen, C. Liu and R. W. Berg, *J. Raman Spectrosc.*, 2011, **42**, 1470–1478.
3. S. Ossinger, H. Naggert, E. Bill, C. Näther, and F. Tuczek, *Inorg. Chem.* 2019, 58, 12873–12887.
4. J. Bautz, P. Comba, and L. Q. Jr. *Inorg. Chem.*, 2006, **45**, 7077-7082.
5. Priyanka Gautam, Om Prakash, R.K. Dani, M.K. Bharty, N.K. Singh, Ranjan K. Singh, *J. Mol. Struct.*, 2017, **1127**, 489-497.
6. R. Meier, J. Maigut, B. Kallies, N. Lehnert, F. Paulat, F. W. Heinemann, G. Zahn, M. P. Feth, H. Krautscheid and R. V. Eldik, *Chem. Commun.*, 2007, 3960–3962.
